# Supplementary material
Source: publisher figshare collection journal article supplement (https://gsajournals.figshare.com/ndownloader/files/25680158)
Supplement: Supplementary file 2 [file 25680158]

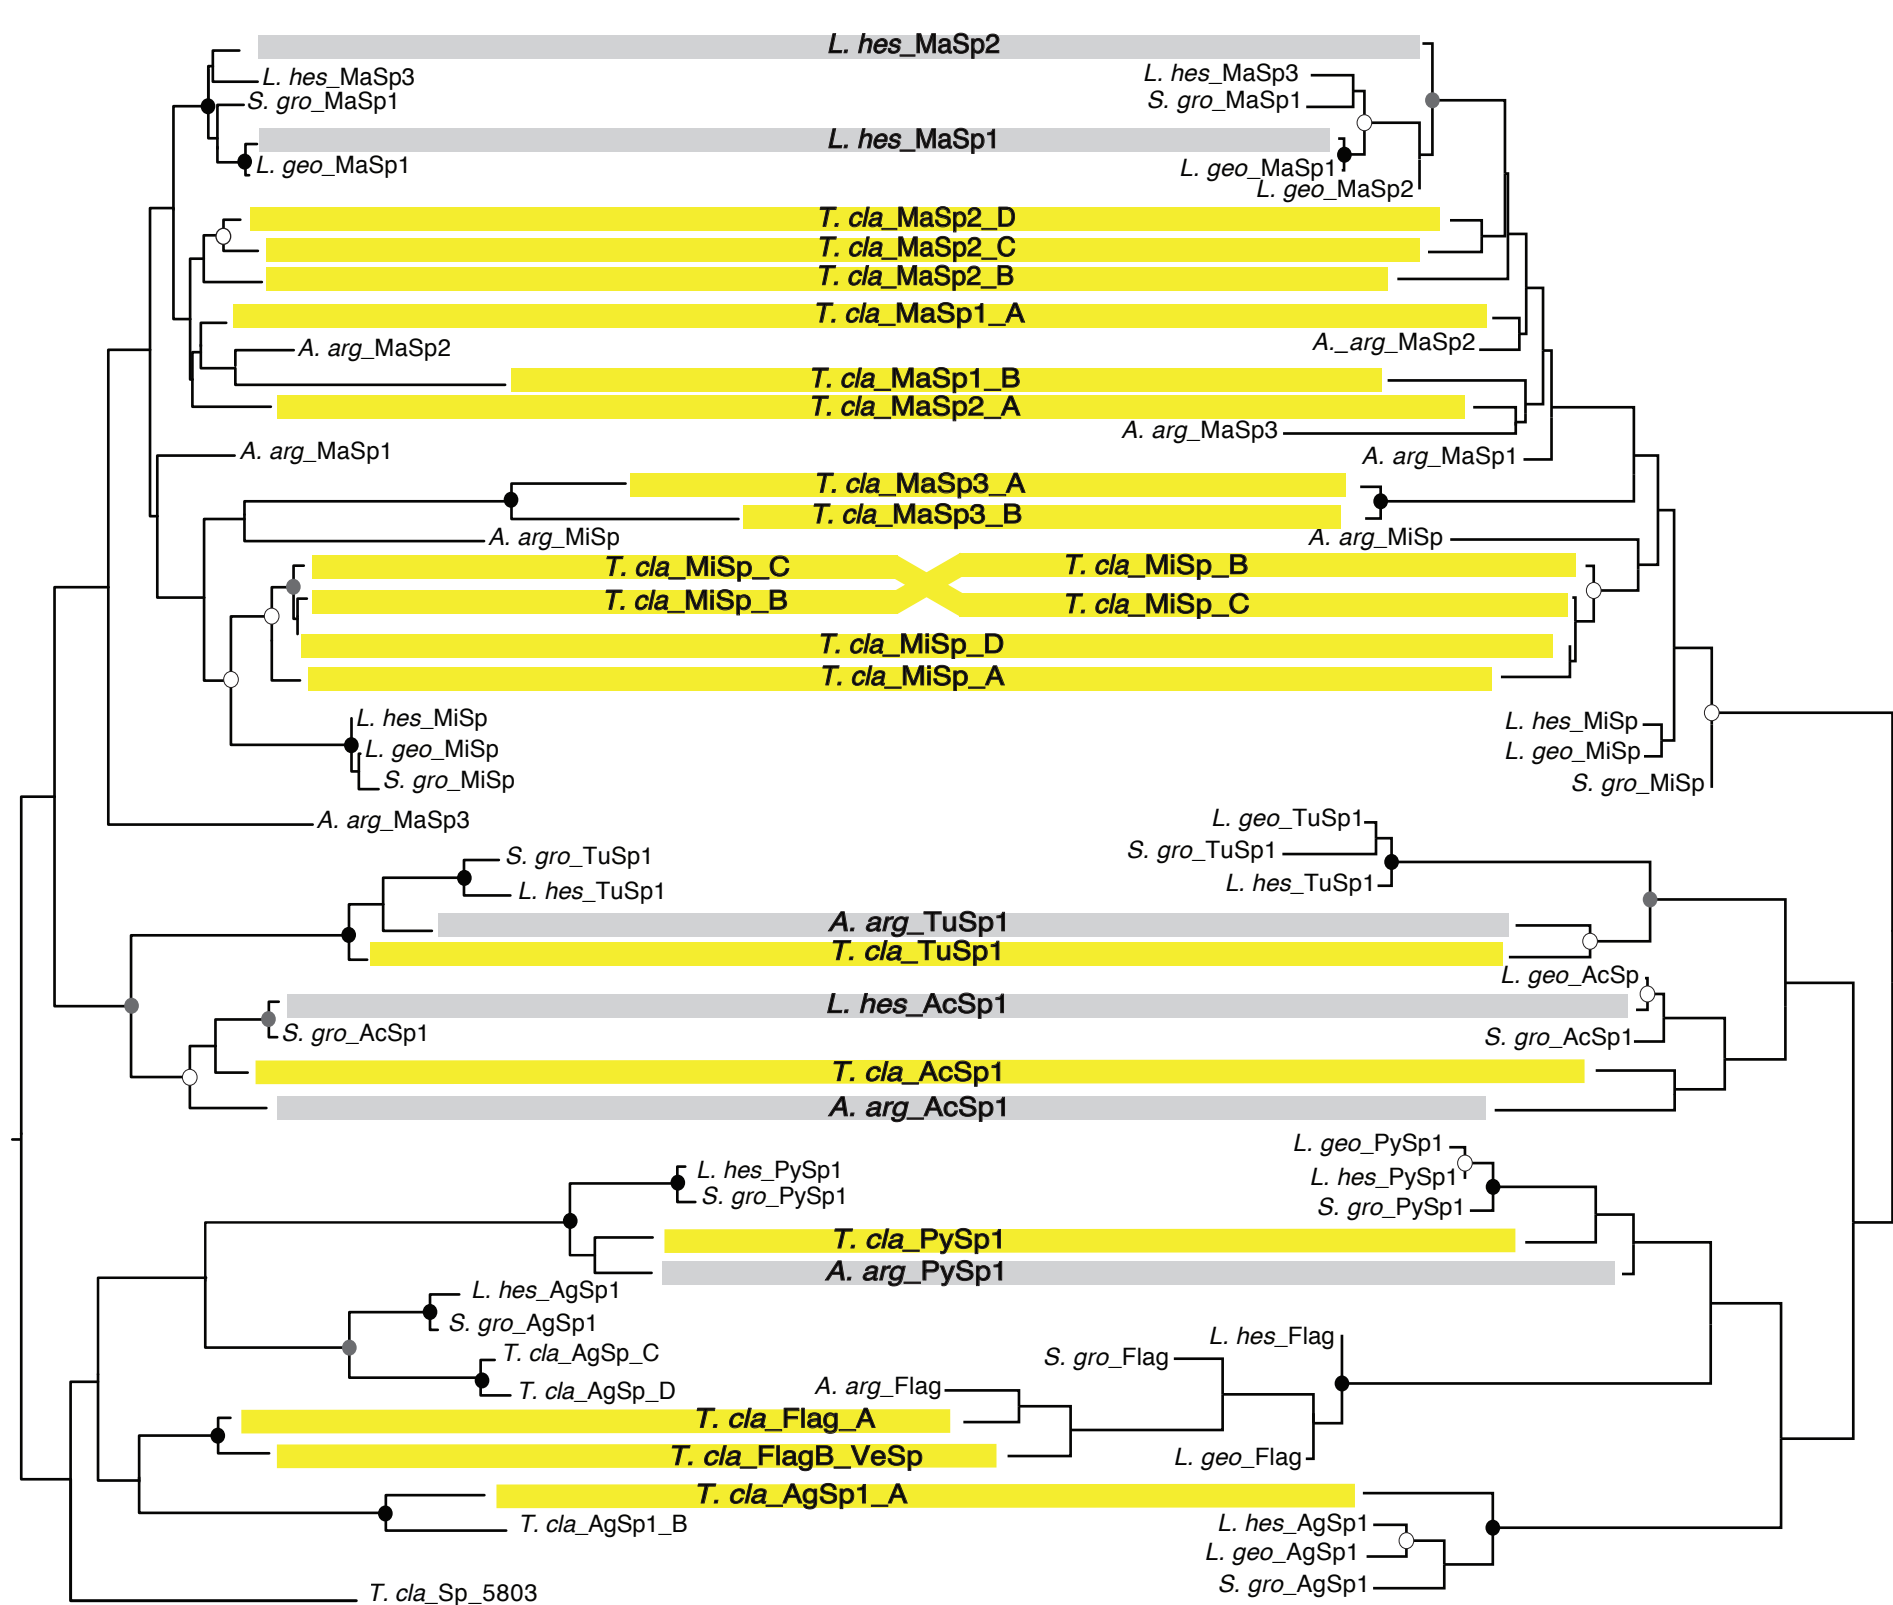

**Figure S1.** Phylogenetic trees from separate analyses of spideroin amino (N)- and carboxyl (C)-terminal regions. Yellow bars connect linked N- and C-terminal regions from *Trichonephila clavipes* (*T. cla*). Gray bars connect the linked terminal regions from other species. Circles at internal nodes indicate bootstrap-supporting values as follows: black circles  $\geq 95\%$ , gray circles  $\geq 85\%$ , and white circles  $\geq 70\%$ . Scale bar indicates substitution per site. Species names abbreviated as *L.hes* for *Latrodectus hesperus*, *L. geo* for *Latrodectus geometricus*, *S. gro* for *Steatoda grossa*, and *A. arg* for *Argiope argentata*.
