# Supplementary material
Source: publisher figshare collection journal article supplement (https://gsajournals.figshare.com/ndownloader/files/25680158)
Supplement: Supplementary file 4 [file 25680158]

**Table S1.** *Trichonephila clavipes* sample information.

| ID      | Species                                    | Common name                     | Sex | Location                               | Tissue subsections                                                                                                                                                    | Extraction     | Application                                                                      |
|---------|--------------------------------------------|---------------------------------|-----|----------------------------------------|-----------------------------------------------------------------------------------------------------------------------------------------------------------------------|----------------|----------------------------------------------------------------------------------|
| Nep-021 | <i>Trichonephila clavipes</i> <sup>a</sup> | Golden (silk) orb weaver spider | M   | Charleston County, South Carolina, USA | Cephalothorax (no venom), venom glands, pedipalps and legs, major ampullate glands, minor ampullate glands, all other silk glands attached to spinnerets              | Trizol, RNeasy | 6 tissue-specific RNA extractions, cDNA production, and qPCR expression analyses |
| Nep-022 | <i>Trichonephila clavipes</i> <sup>a</sup> | Golden (silk) orb weaver spider | M   | Charleston County, South Carolina, USA | Cephalothorax (no venom), venom glands, pedipalps and legs, all silk glands attached to spinnerets                                                                    | Trizol, RNeasy | 4 tissue-specific RNA extractions, cDNA production, and qPCR expression analyses |
| Nep-023 | <i>Trichonephila clavipes</i> <sup>a</sup> | Golden (silk) orb weaver spider | M   | Charleston County, South Carolina, USA | Cephalothorax (no venom), venom glands, pedipalps and legs, major ampullate glands, minor ampullate glands, all other silk glands attached to spinnerets              | Trizol, RNeasy | 6 tissue-specific RNA extractions, cDNA production, and qPCR expression analyses |
| Nep-024 | <i>Trichonephila clavipes</i> <sup>a</sup> | Golden (silk) orb weaver spider | M   | Charleston County, South Carolina, USA | Cephalothorax (no venom), venom glands, pedipalps and legs, all silk glands attached to spinnerets                                                                    | Trizol, RNeasy | 4 tissue-specific RNA extractions, cDNA production, and qPCR expression analyses |
| Nep-025 | <i>Trichonephila clavipes</i> <sup>a</sup> | Golden (silk) orb weaver spider | F   | Charleston County, South Carolina, USA | Legs (two extracts), anterior cephalothorax (no pedipalps, chelicerae, or fangs), posterior cephalothorax, anterior abdomen, posterior abdomen, pedipalps, chelicerae | Trizol, RNeasy | 8 tissue-specific RNA extractions, cDNA production, and qPCR expression analyses |
| Nep-026 | <i>Trichonephila clavipes</i> <sup>a</sup> | Golden (silk) orb weaver spider | F   | Charleston County, South Carolina, USA | Legs (two extracts), anterior cephalothorax (no pedipalps, chelicerae, or fangs), posterior cephalothorax, anterior abdomen, posterior abdomen, pedipalps, chelicerae | Trizol, RNeasy | 8 tissue-specific RNA extractions, cDNA production, and qPCR expression analyses |
| Nep-027 | <i>Trichonephila clavipes</i> <sup>a</sup> | Golden (silk) orb weaver spider | F   | Charleston County, South Carolina, USA | Legs (two extracts), anterior cephalothorax (no pedipalps, chelicerae, or fangs), posterior cephalothorax, anterior abdomen, posterior abdomen, pedipalps, chelicerae | Trizol, RNeasy | 8 tissue-specific RNA extractions, cDNA production, and qPCR expression analyses |
| Nep-028 | <i>Trichonephila clavipes</i> <sup>a</sup> | Golden (silk) orb weaver spider | M   | Charleston County, South Carolina, USA | Pedipalps, legs, cephalothorax , abdomen                                                                                                                              | Trizol, RNeasy | 4 tissue-specific RNA extractions, cDNA production, and qPCR expression analyses |
| Nep-029 | <i>Trichonephila clavipes</i> <sup>a</sup> | Golden (silk) orb weaver spider | M   | Charleston County, South Carolina, USA | Pedipalps, legs, cephalothorax , abdomen                                                                                                                              | Trizol, RNeasy | 4 tissue-specific RNA extractions, cDNA production, and qPCR expression analyses |
| Nep-030 | <i>Trichonephila clavipes</i> <sup>a</sup> | Golden (silk) orb weaver spider | M   | Charleston County, South Carolina, USA | Pedipalps, legs, cephalothorax , abdomen                                                                                                                              | Trizol, RNeasy | 4 tissue-specific RNA extractions, cDNA production, and qPCR expression analyses |

<sup>a</sup> = No special CITES status. Classified as “Least Concern” by IUCN.
