# Supplementary material
Source: publisher figshare collection journal article supplement (https://gsajournals.figshare.com/ndownloader/files/25680158)
Supplement: Supplementary file 5 [file 25680158]

$2^{-\Delta\Delta CT}$ 

SEX: FEMALE MALE

\* p = 0.05 (one-tailed, "greater" in females)

\* p = 0.05 (one-tailed, "greater" in males)

Abdomen

Pedipalps

Cephalothorax

Spidroins

Spidroin-Like (SpL)

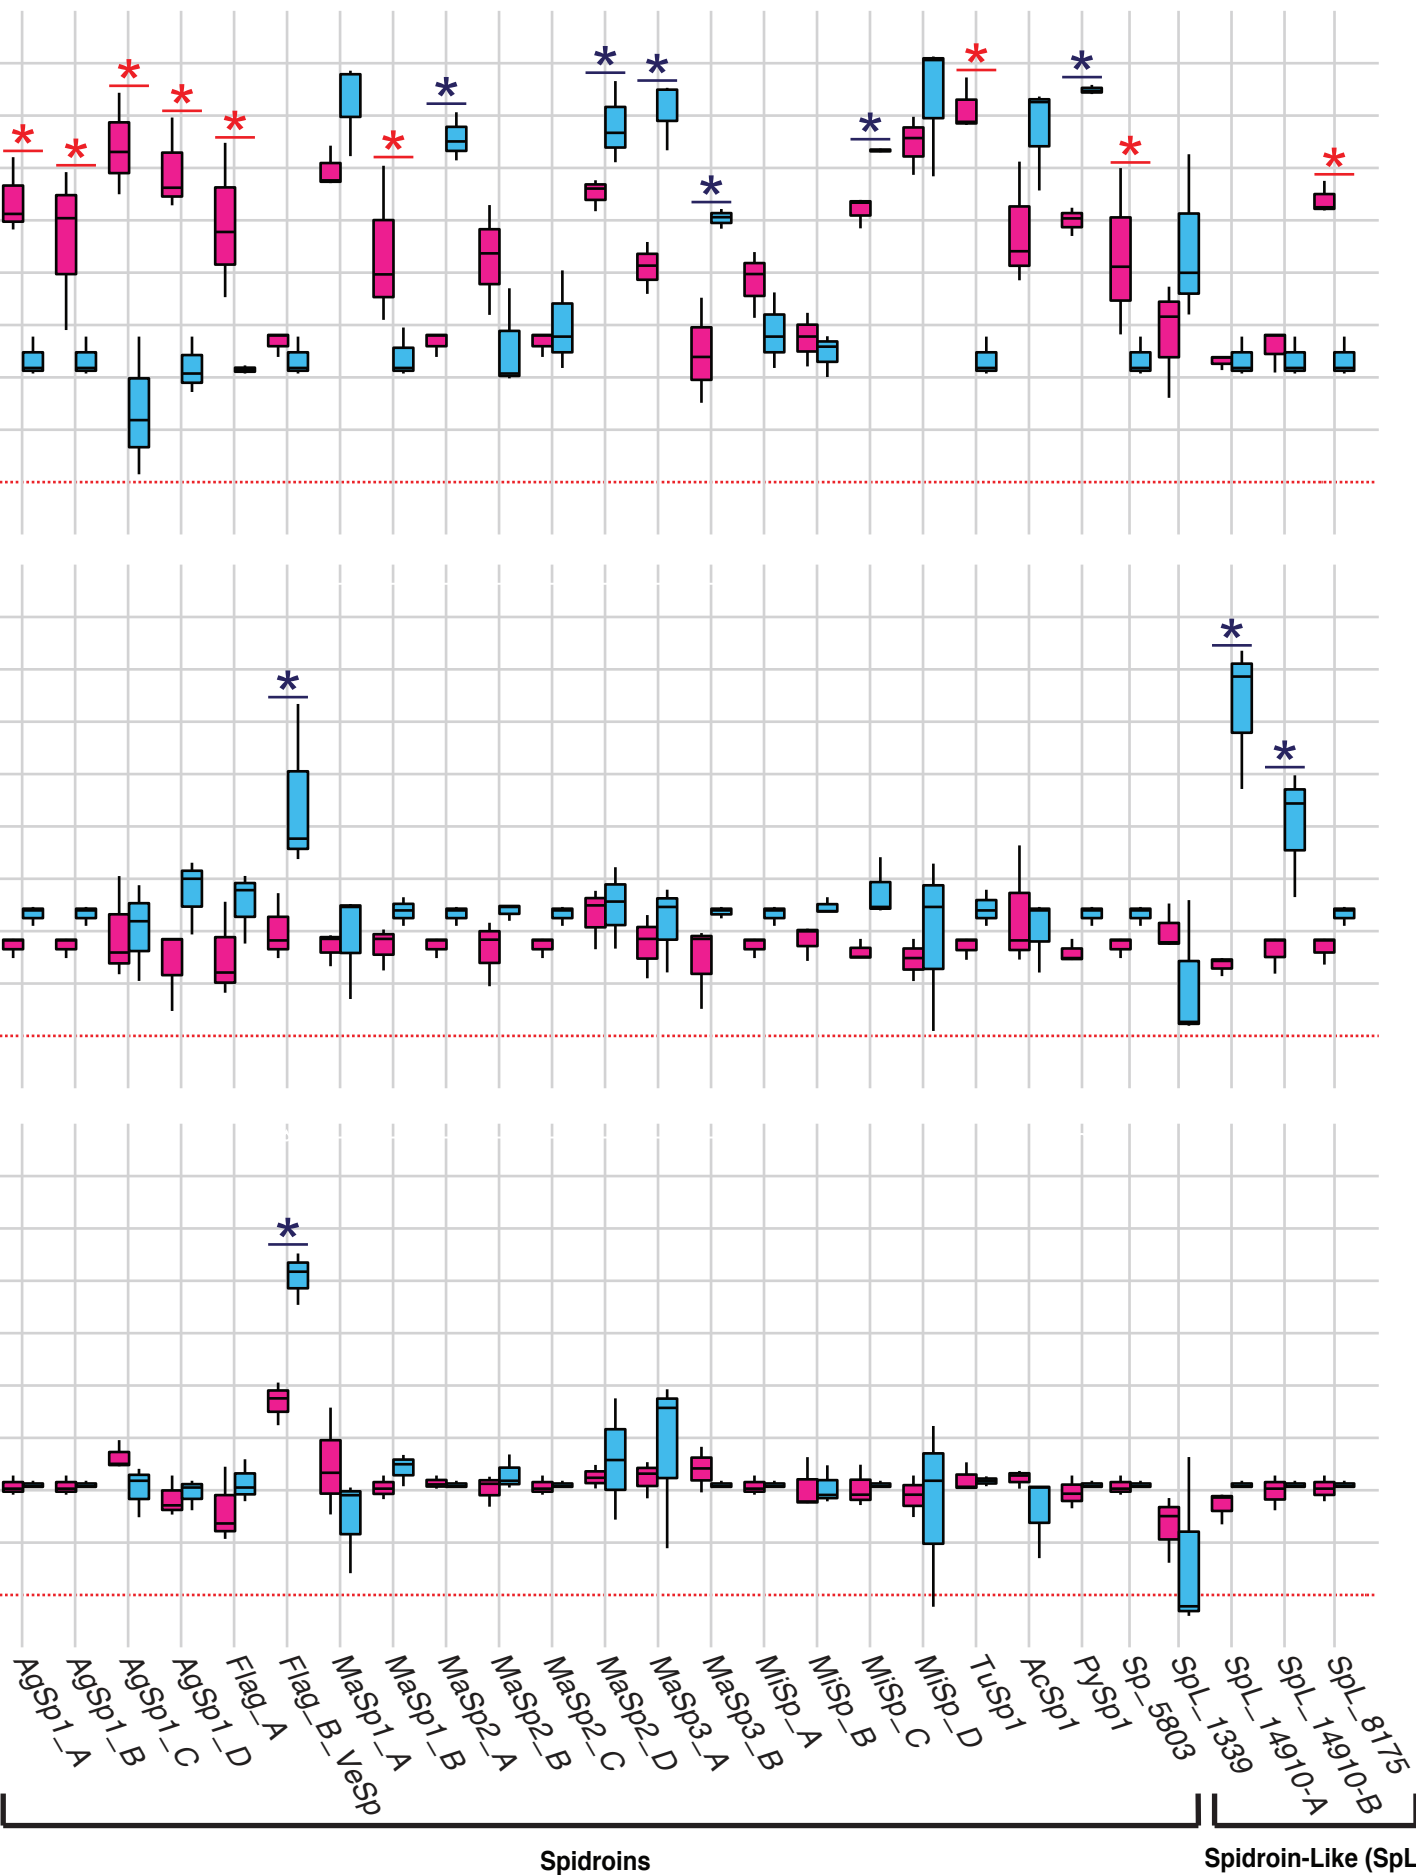

**Figure S3.** Gene expression profiles of three tissue types from male and female *Trichonephila clavipes* individuals. Box-and-whiskers plots showing the relative expression of 26 *T. clavipes* loci in individual tissue dissections (n=3 biological replicates per tissue for each sex) assayed by qPCR. Tissues are depicted in three horizontal panels, and include abdomen (including silk glands), pedipalps, and cephalothorax. Loci are shown on the x-axis, and expression ( $2^{-\Delta\Delta CT}$  method) is depicted on the y-axis ( $\log_{10}$  scale). Box-and-whiskers show the range of expression values of the given gene (left of y-axis) relative to *RPL13a* (housekeeping gene – not shown) expression and normalized to leg tissue (n=3 biological replicates per tissue for each sex). Thick black center lines represent median values. Upper whiskers represent largest observation  $\leq$  upper quartile (Q3) +1.5 interquartile range (IQR), and lower whiskers represent smallest observation  $\geq$  lower quartile (Q1) -1.5(IQR). Red asterisks highlight loci whose expression is significantly greater in females compared to males, whereas dark blue asterisks indicate loci whose expression is significantly greater in males compared to females ( $p = 0.05$ , normalized to leg tissue, one-tailed Wilcoxon rank sum tests).
