# Supplementary material
Source: publisher figshare collection journal article supplement (https://gsajournals.figshare.com/ndownloader/files/25680158)
Supplement: Supplementary file 6 [file 25680158]

**A.**

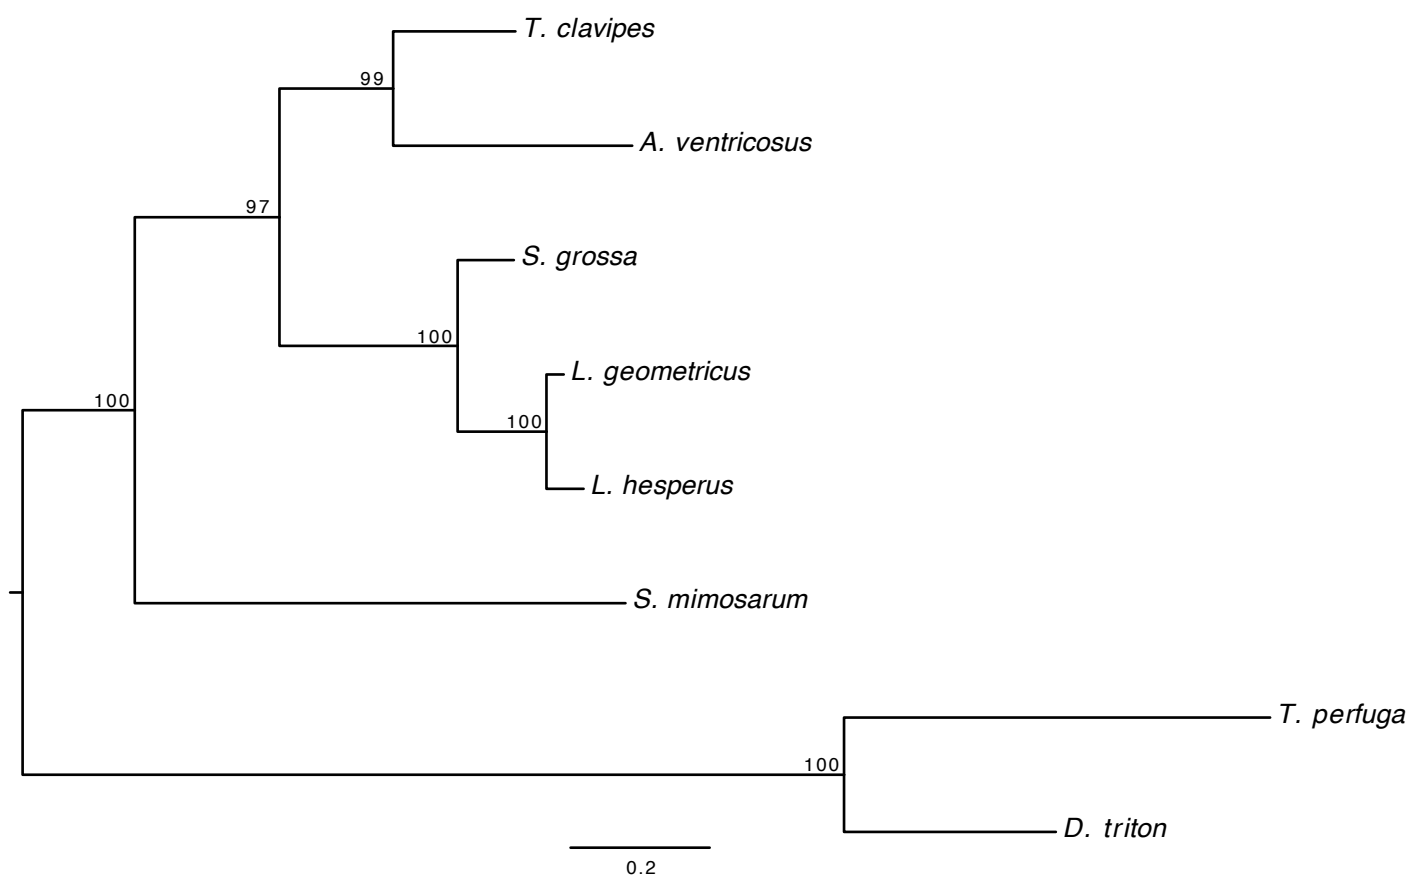

**B.**

|                       |     |                                                                                                          |
|-----------------------|-----|----------------------------------------------------------------------------------------------------------|
| <i>T. clavipes</i>    | 1   | GGANASISLFEATIASFKQRLGPELLKDKYFKTVFSDSIIPAAVSSLSAIAQFLSKAFSLPRSYLVALENDIALLVKNEITSPEAYADGISTSFINLLAA     |
| <i>A. ventricosus</i> | 1   | ANVNGTLTPEDAMVLFQORLKDDLNRNRYRSVFSDSIPTAAVSNIASATAQFLSKAFKLPRSYLLNLES DITTHIRRDIAPEBYAEGVSTSFVNLLTA      |
| <i>L. hesperus</i>    | 1   | GKENSTLGMKEVIEVFQKLFMELLKDKYKFNFFSESVPATAVNGLASAVAQFLSKAFNIPRTYLLGLENDIKNFVKNDLTSPDAYAQGISVSLTNILTA      |
| <i>L. geometricus</i> | 1   | GKENSTLGMKEAIEVFQKLFMELLKDKYKSFSESVPATAVNGLASAVAQFLSKAFNIPRTYLLGLENDIKNFVKNDLTSPDAYAQGISVSLTNILTA        |
| <i>S. grossa</i>      | 1   | GKGNSTLGTKEAIEVFQKLFSELLKDKYRSIFSSEVPAAAVSGLASATAQFLSKAFNVPRTYLLGLENDINNFKVNDLATPNDYAEGISVSLTNILTA       |
| <i>S. mimosarum</i>   | 1   | GNDLISLDLTDIIQIFQDRILAVRLLRNRYRSIFS SSIIPSVLNSVSSVITQFLAKAERTIPRSYLLTLEKNLSVSGQTDQLTVESYAQSTAAANGNIIIA   |
| <i>T. perfluga</i>    | 1   | ALDVDSVSHAEITLFFKIELTAELLKDKYINYLSDCIPVSALKLIASAITOYLSQAFTIPQTYILPLENVIANLFSNPNLSLRIRIEIMVDILTLLSS       |
| <i>D. triton</i>      | 1   | DLNVDSVSAEAIIGLFRTBLIRELLKDRYERYVFS DYVVSALKLIIAAMNQHAKAFTVPRS YLLSMENLAVNLP SDKAISPELWADIITASLTNLFSA    |
|                       |     | 0.2                                                                                                      |
| <i>T. clavipes</i>    | 101 | ANLLVPSAIGVOVGMASKAITSGLLNLYLGTYYKAVGVGLGIGSNPNYSYFSVLSGLEMLPYVGPDAVSRKYPPILKAAKASNF GAKFSKALSSNLISSSTKE |
| <i>A. ventricosus</i> | 101 | ANLLVPSAIGVOVGMASKAITSGVLFNFIATNKVAGVGLGIGSNPNYSYFSILSGLEMLPYVGPDAVSRKYPPILKAVRATNFGARFTQAMISNLISSNKE    |
| <i>L. hesperus</i>    | 101 | LGILSPSVIGIQITTTAAKAITGAILNFLSTSTVPGVGLSVSNPNYSYFSVLSGLEMLPYVGPDAVSRKYPPILKAAKASAFSSRFKRALYNNLISSGKE     |
| <i>L. geometricus</i> | 101 | LGILSPSVIGIQITMAAKAITGAILNFLSTSTVPGVGLSVSNPNYSYFSVLSGLEMLPYVGPDAVSRKYPPILKAAKASAFSSRFKRALYNNLISSGKE      |
| <i>S. grossa</i>      | 101 | LGILSPSVIGIQISMASKAITGGILNFLSTSTVPGVGLSISNPNYSYFSVLSGLEMLPYVGPDAVSRKYPPILKAAKASTFSTKFKKALYSNLISSSRE      |
| <i>S. mimosarum</i>   | 101 | VDILTFSIIDLQASTASKAVVSAIENFLITSAPVGVGLSVNGNPNYSYFSALSGLEMLPYVGPDTISRKFPPVLKAVKASAFSSRFKALYLNLISSASRE     |
| <i>T. perfluga</i>    | 101 | INLITTTTARLOVATAAKAITSGIANYLGLSAIPGVGIVINRNFYLSYFSVLNGLEKLPYVGIDATSRKLPPTVLKKNANAFVQFERTILLYNLISSCNRE    |
| <i>D. triton</i>      | 101 | VNLITSATARLOVTMAAKAITSGIKTFIGISAIIPGVGLGINGNSYNSYFSVLNGLEKLPYVGTDAVSQKLPPIVKNAEASRFASRFTETLIFYNLISANRE   |
| <i>T. clavipes</i>    | 201 | SDAFLLGIPAPAWKKIAKSLGKNMAEAFGSPNPTFFSDIYANALLSVGEKLSYKTYARVLAATSKALYALGYFVSGNPNIOAAIASNAIVKGI--KSR       |
| <i>A. ventricosus</i> | 201 | SDAFLLGVPAPAWKQVAQCTIGNSVAAEAFGSPNPTFFTDVYANALLSMGEKLSYKTYARVLSAATAKALYALGYFVSGNPNIOAAIAANAIKTIIV-RCQ    |
| <i>L. hesperus</i>    | 201 | TNVTLLGVSKPTIKNLVLSLGNVAAEAFGSPNPSYFVDSYANALLTLGTRLSYKTYAKVIAETAKALYALGYFVSGNPNIOAAIASNAIFKALQSKSR       |
| <i>L. geometricus</i> | 201 | TNAFTLLGIPKPTLKNLVLISLGNVIAEAFGSPNPSYFVDSYANALLSLGPRLSYKTYAKVIAETAKALYALGYFVSGNPNIOAAIASNAIFKALQSKSR     |
| <i>S. grossa</i>      | 201 | SEAFLLGIPATSWKTLANS LGNVAAEAFGSPNPPFFVDSYSNALLSLGPKLSYKTYAKVIAETAKALYALGYFVSGNPNIOAAIASNAIVIKALQSKSR     |
| <i>S. mimosarum</i>   | 201 | CESFQLGVFVSSYKTLAITLGNVAAEAFGSPNPSYFVIDIYSKALLSSKETLDYKTSAQILAAQATAKALYALGYFVSGNPNIOAAIAANAVIRAVSRSR     |
| <i>T. perfluga</i>    | 201 | SDAFLLGVPFTYKMIANSLGDYMAEAFGSPNPSYFAHYVVSVMTTISKNLNHEAYARALSSSTAKALYALGYFVSGNPNIOAAIATNATIGALTTSKR       |
| <i>D. triton</i>      | 201 | SEAFLLGVHPLTYKIANS LGNFVAAEAFGSPSPSFSDIYTDALLISANKLNYKTYARTISLATAKALFILGYFSSGDNIOAAIAANAVIRALTEKSR       |

**Figure S5.** Phylogenetic analyses **A)** and sequence alignment **B)** of SpL\_1339 central regions from *Trichonephila clavipes*, *Araneus ventricosus*, *Latrodectus hesperus*, *L. geometricus*, *Steatoda grossa*, *Stegodyphus mimorasum*, *Tengella perfuga*, and *Dolomedes triton*. Maximum likelihood analysis shows relationships that are consistent with the expected species tree, including recovery of a cob-weaver clade, an orb-weaver clade, a monophyletic cob- and orb-weaver clade, and placement of *S. mimosarum* outside of the cob- and orb-weaver clade. Bootstrap support greater than 50% is shown. Scale bar indicates substitution per site. Dashes are alignment gaps. Amino acids conserved across species shown highlighted in black. Amino acid positions for each sequence are numbered on the left.
