# Supplementary material
Source: publisher figshare collection journal article supplement (https://gsajournals.figshare.com/ndownloader/files/25680158)
Supplement: Supplementary file 8 [file 25680158]

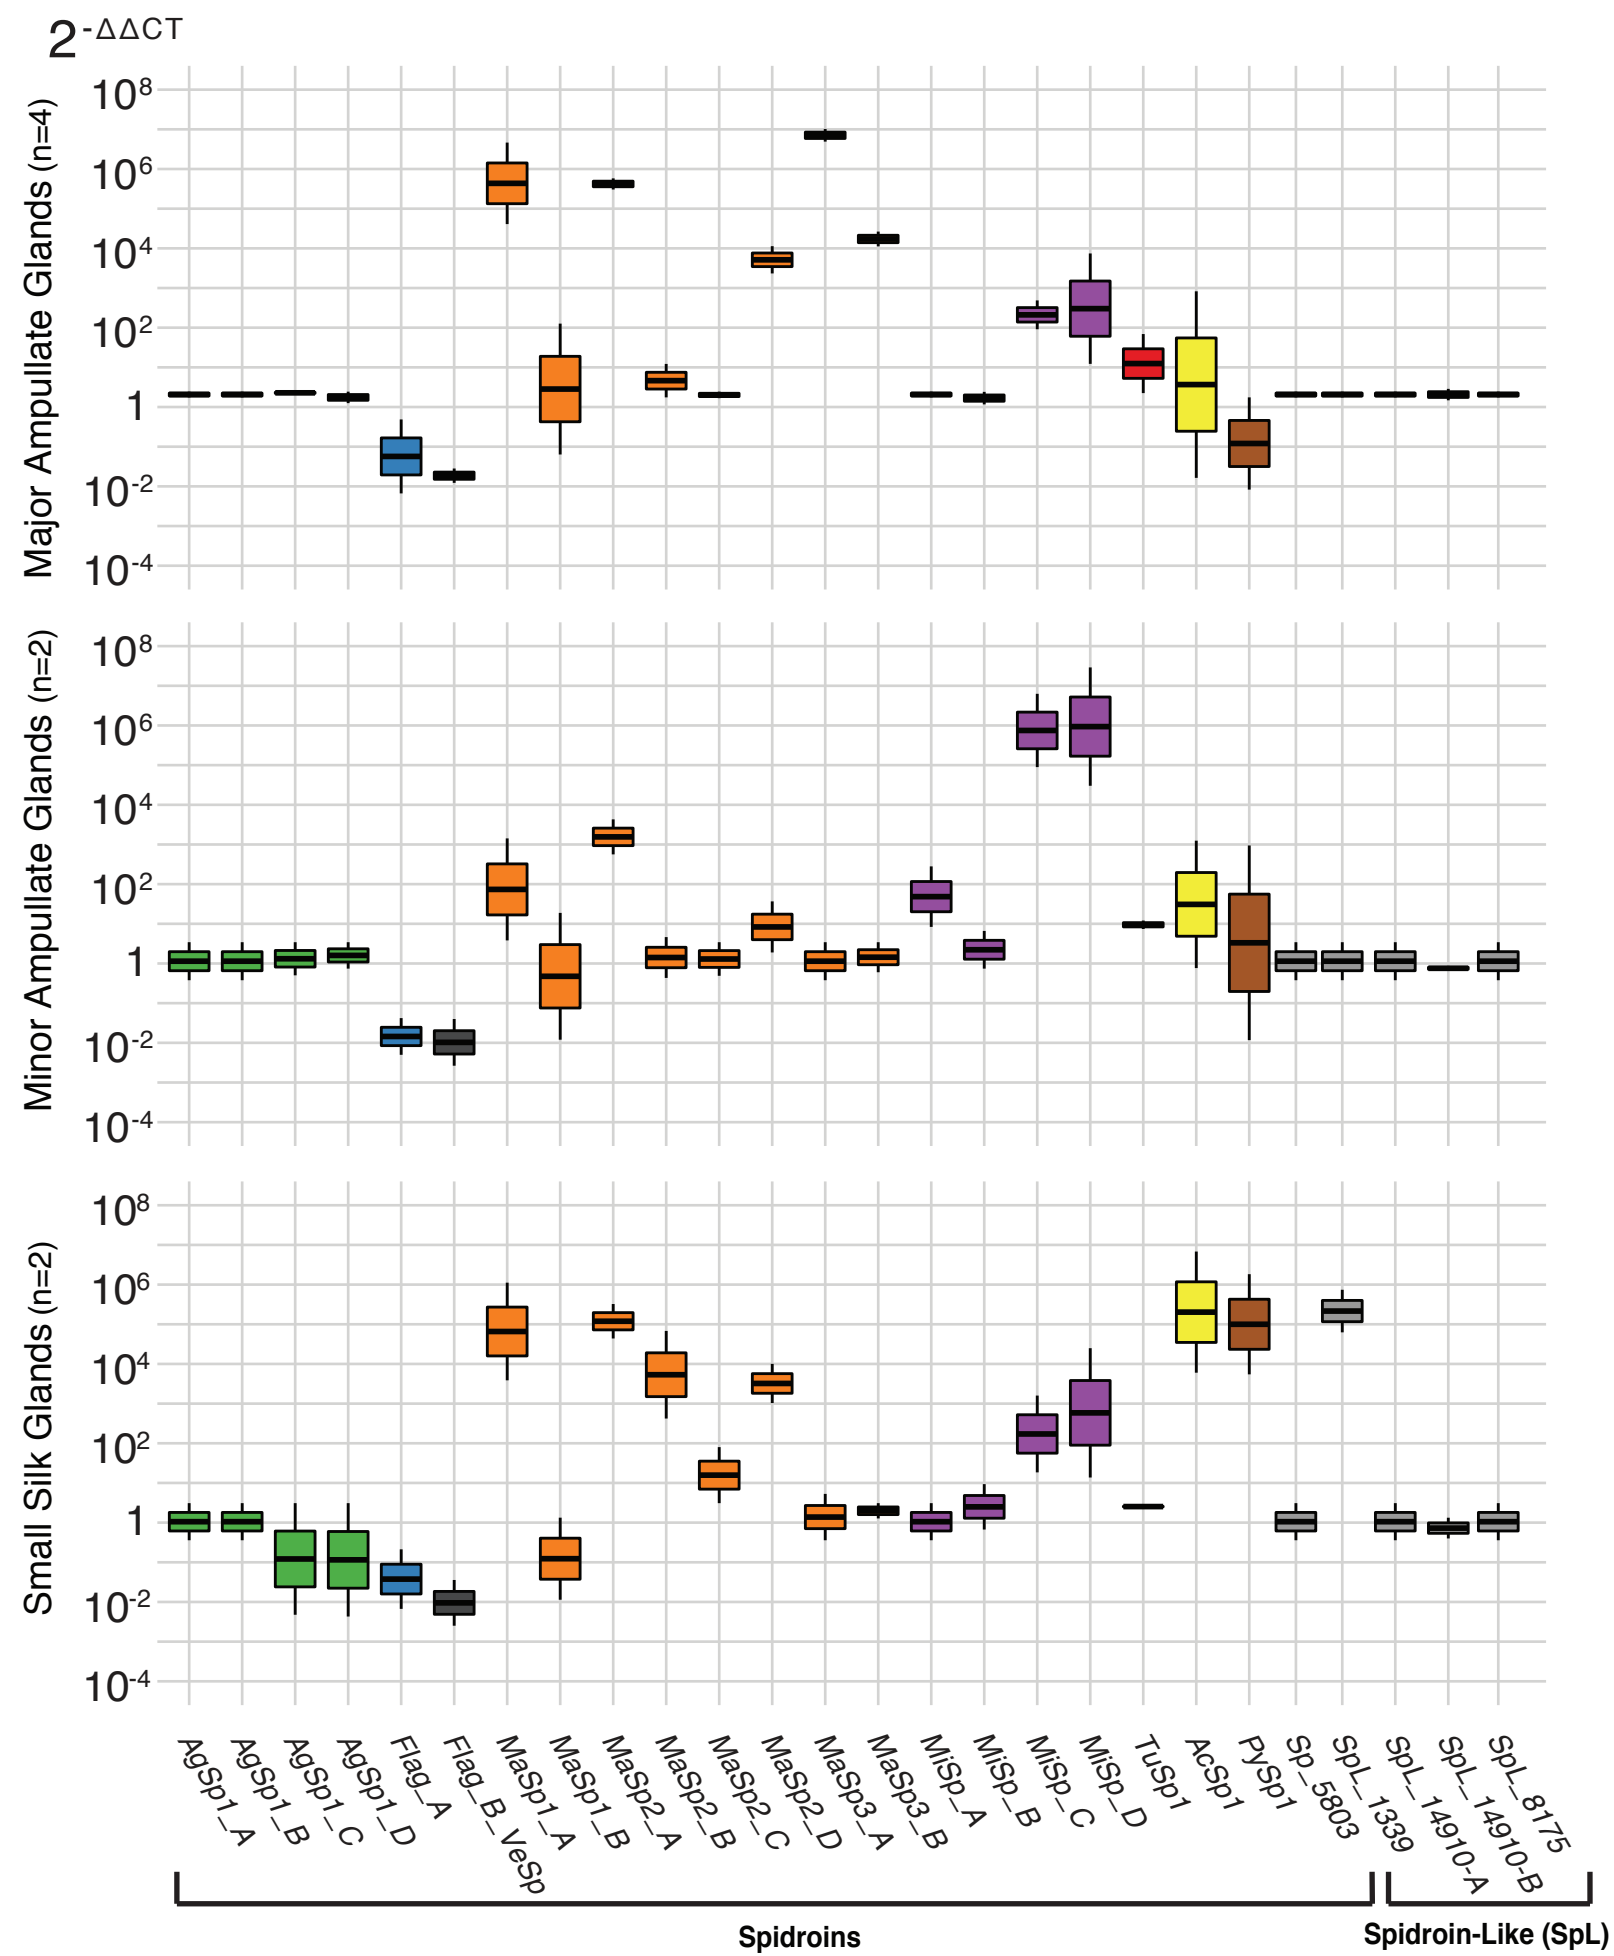

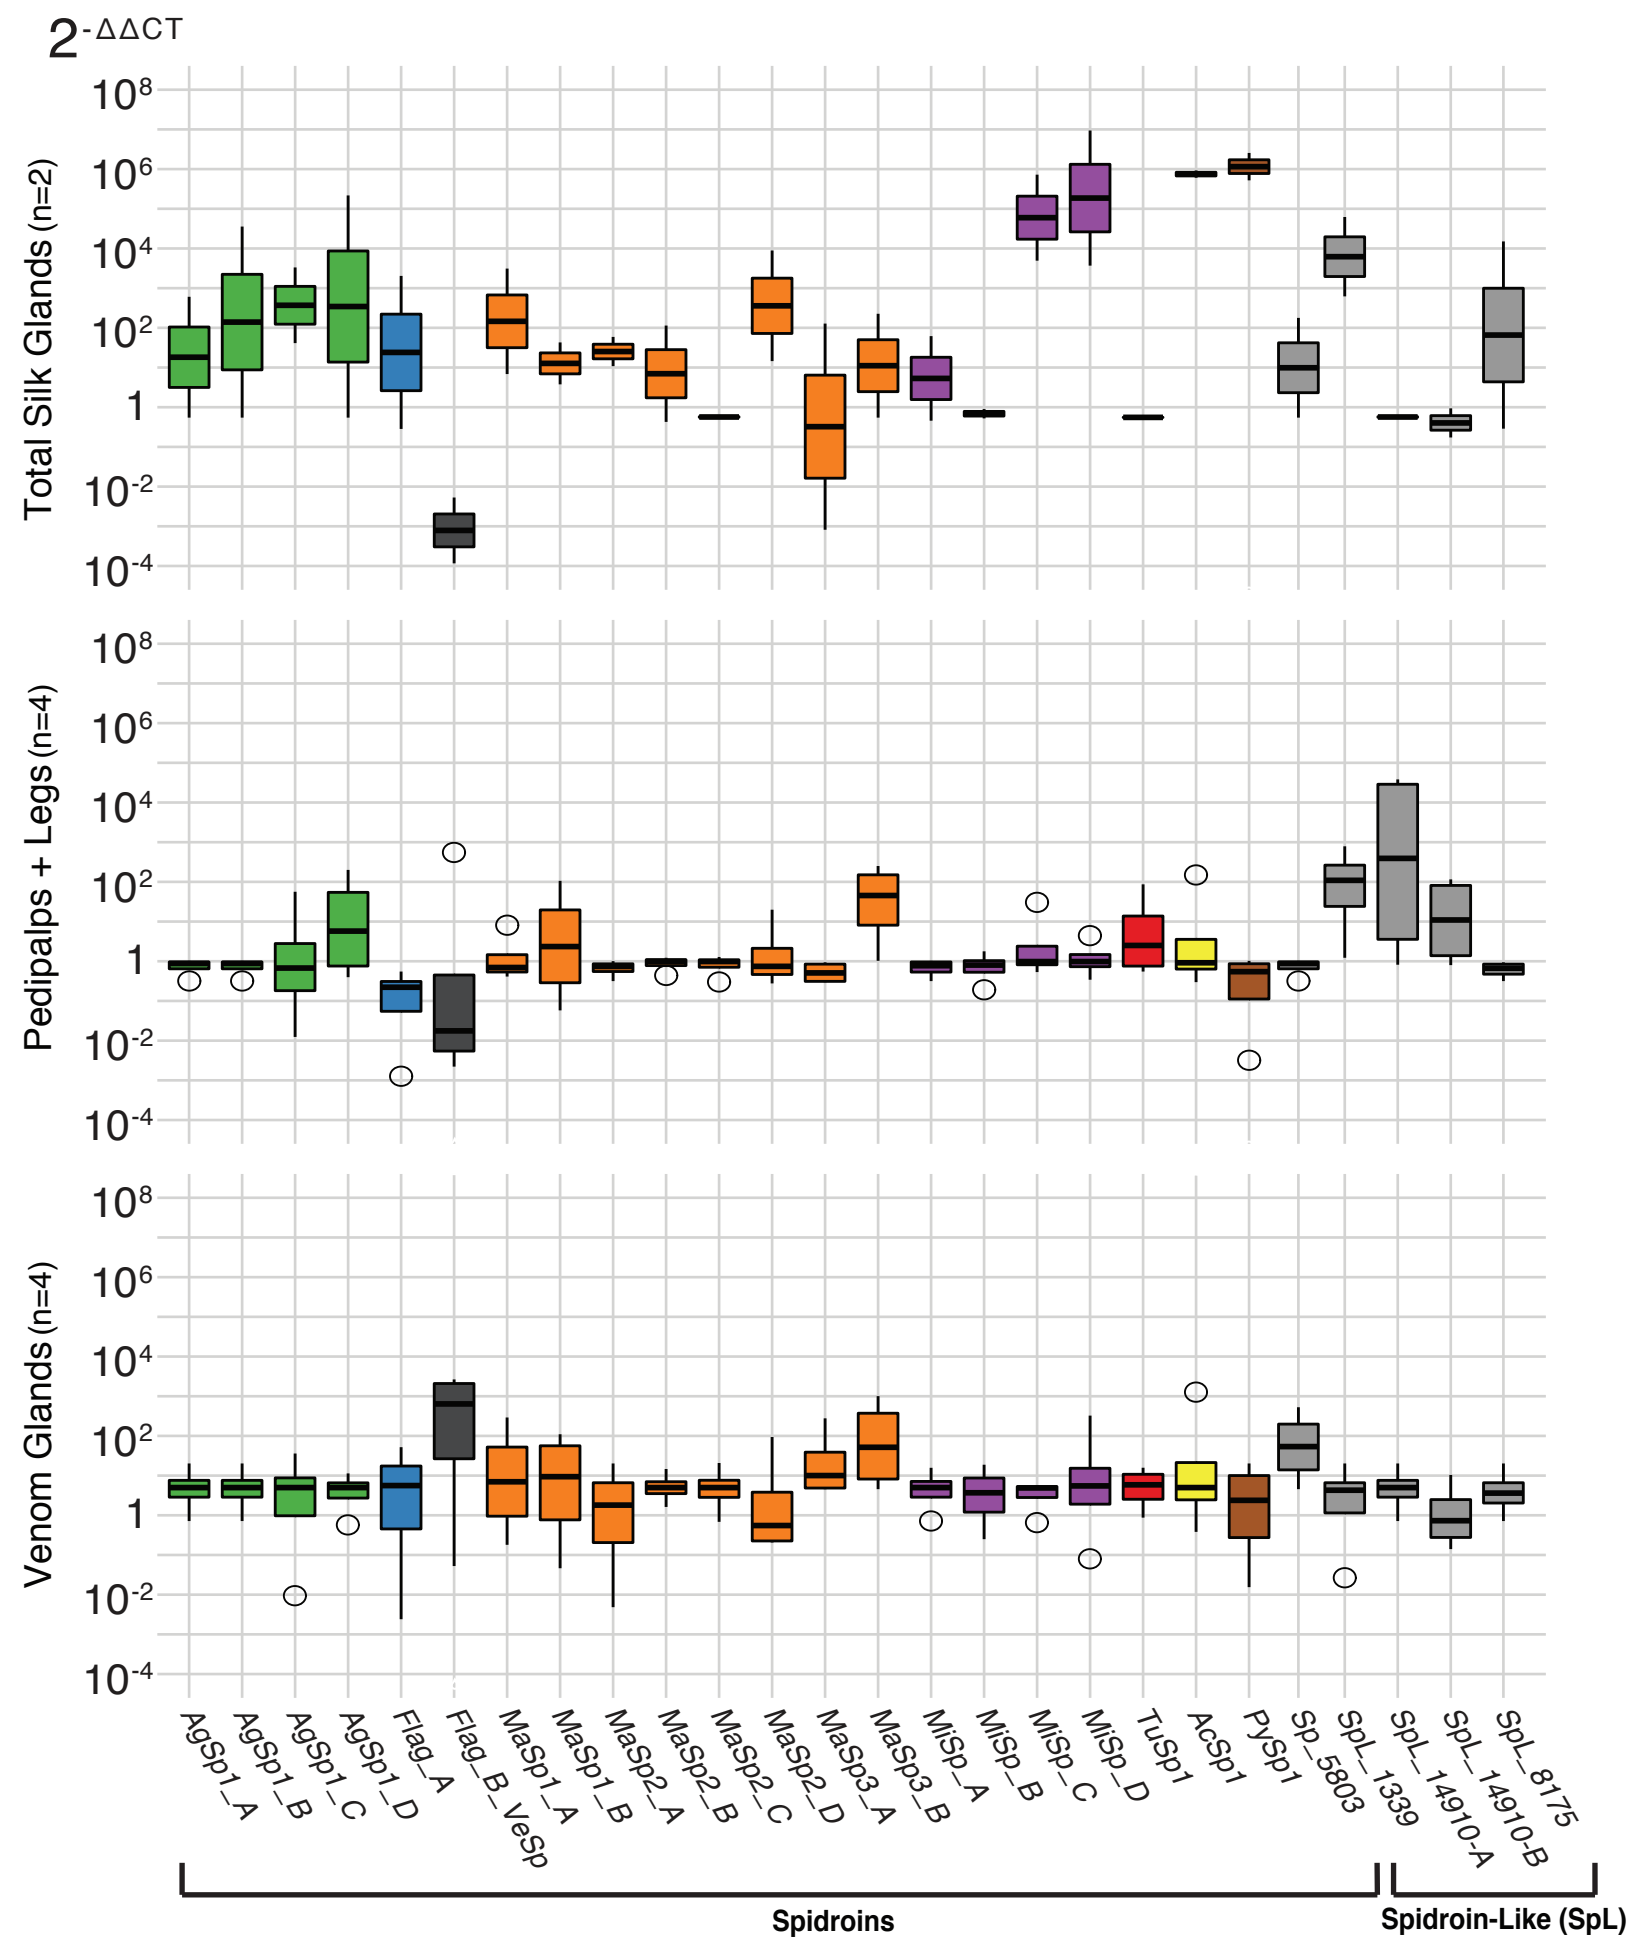

**Figure S4.** Distributions of relative expression values of genes across six tissue types from mature male *T. clavipes* individuals. Box-and-whisker plots of the relative expression for 26 *T. clavipes* genes in tissue dissections assayed by qPCR. Sample numbers of (n=2 or 4 independent specimen biological replicates per tissue) are denoted left of each panel's y-axis. Tissues, depicted as horizontal panels, listed top to bottom are: major ampullate glands, minor ampullate glands, "small" silk glands (e.g., aciniform and piriform glands attached to spinneret), "total" silk glands, pedipalps and leg, and venom glands. Loci are shown on the x-axis, and circular symbols denote silk class – with putative functional application and presumed gland of origin. Relative expression ( $2^{-\Delta\Delta CT}$  method) is depicted on the y-axis ( $\log_{10}$  scale). Box-and-whiskers show the range of expression values of the given spidroin gene (left of y-axis) relative to *RPL13a* (housekeeping gene-not shown) expression, and normalized to head tissue (n=3 biological replicates per tissue for each sex). Thick black center lines represent median values. Upper whiskers represent largest observation  $\leq$  upper quartile (Q3) +1.5 interquartile range (IQR), and lower whiskers represent smallest observation  $\geq$  lower quartile (Q1) -1.5(IQR).
