# Supplementary material
Source: publisher figshare collection journal article supplement (https://gsajournals.figshare.com/ndownloader/files/25680158)
Supplement: Supplementary file 10 [file 25680158]

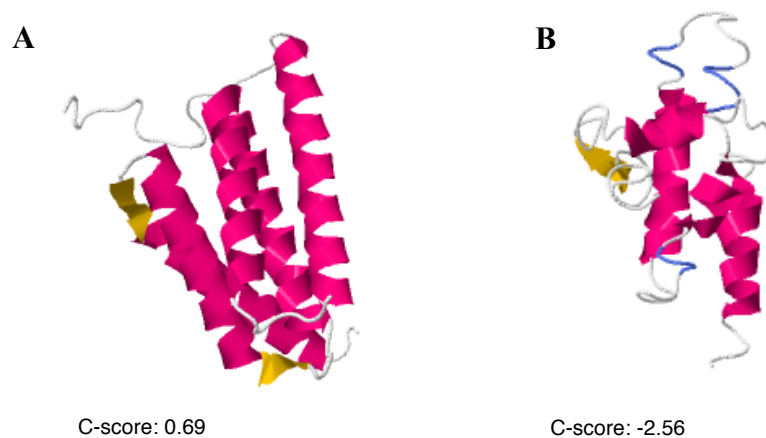

**Figure S6.** I-Tasser predicted 3D structures of Sp\_5803 **A)** Amino-terminal region and **B)** Carboxy-terminal region. Alpha-helices and beta-sheets are shown in magenta and yellow, respectively. Confidence score that estimates the quality of the predicted models is shown. Confidence (C-) scores estimate the quality of the predicted models, with a higher score indicating higher confidence in the model.
