# Supplementary material
Source: publisher figshare collection journal article supplement (https://gsajournals.figshare.com/ndownloader/files/25680158)
Supplement: Supplementary file 14 [file 25680158]

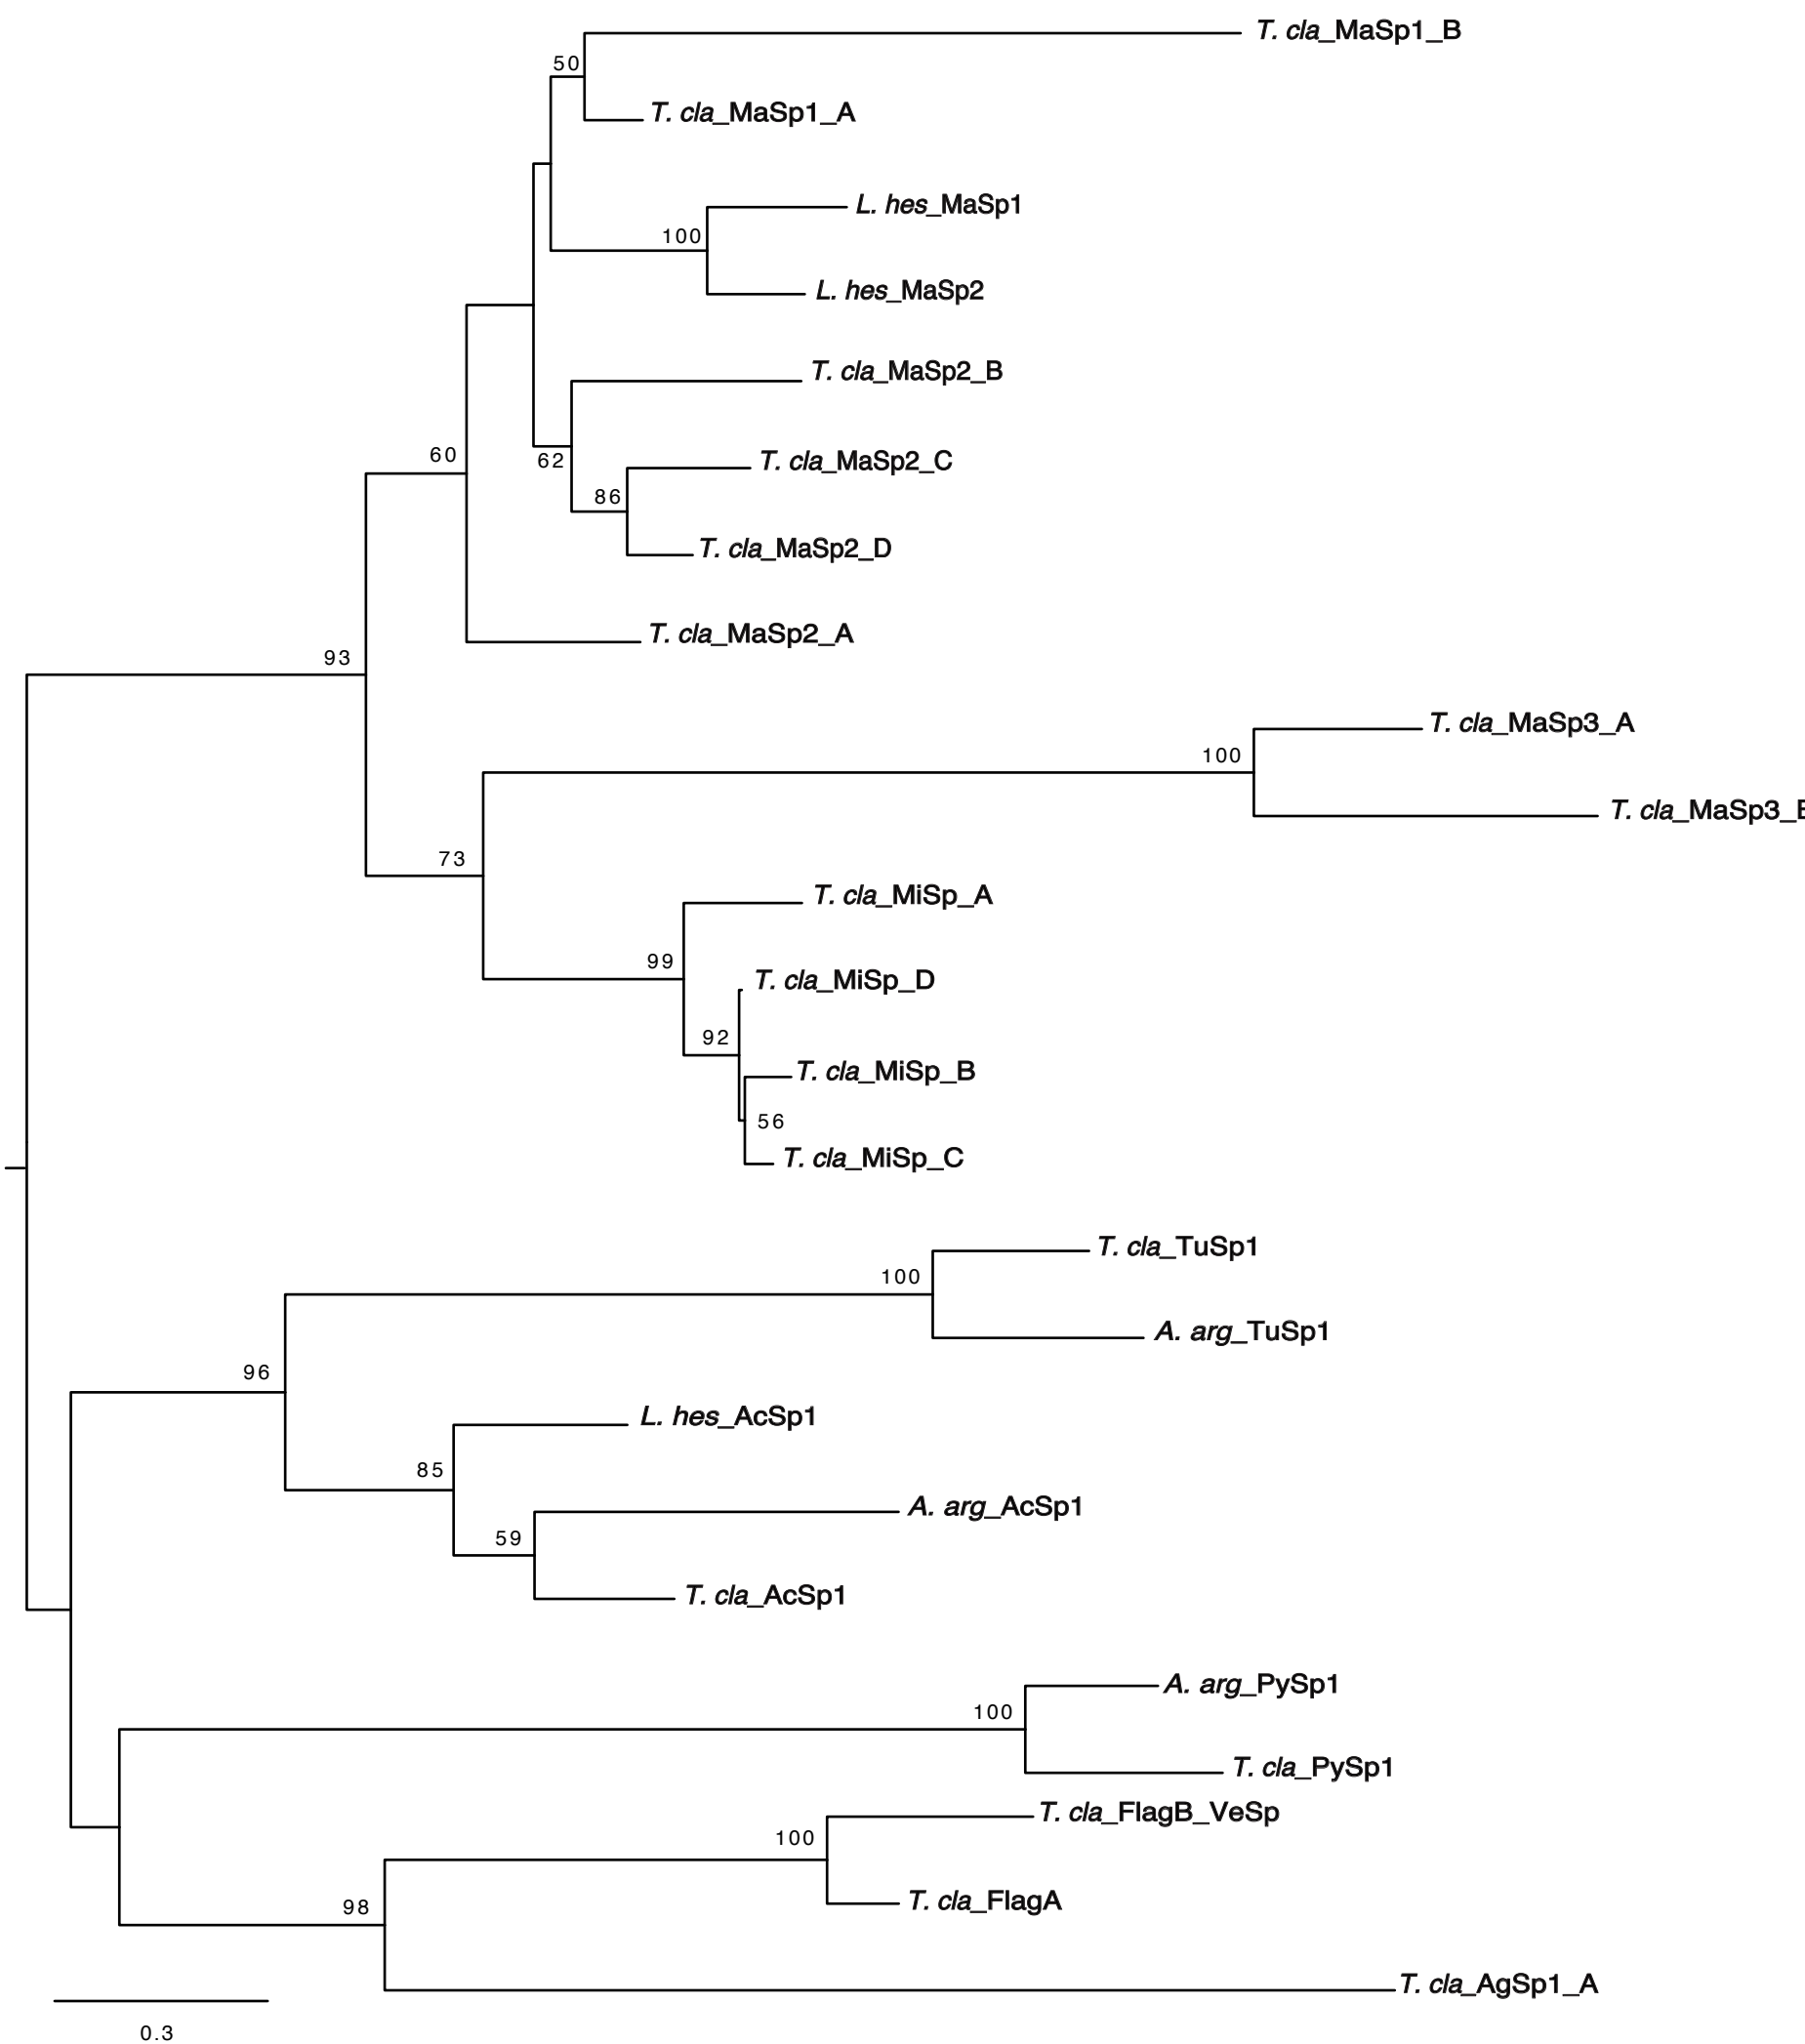

**Figure S2.** Phylogenetic trees from concatenated analyses of spidroin N- and C- terminal regions. Bootstrap support greater than 50% is shown. Scale bar indicates substitution per site. Species names abbreviated as *L. hes* for *Latrodectus hesperus*, *L. geo* for *Latrodectus geometricus*, *S. gro* for *Steatoda grossa*, and *A. arg* for *Argiope argentata*.
